# Supplementary material for: PD1+CD8+ Cells Are an Independent Prognostic Marker in Patients with Head and Neck Cancer
Source: MDPI journal article supplement (doi:10.3390/biomedicines10112794), 2022-11-03
Supplement: s1 [file s1]

**Table S1.** Reaction conditions for each panel of antibodies. The order of antibodies and buffer used for epitope retrieval (AR) are indicated as well as the reaction conditions for the primary antibody and OPAL fluorophore staining. For all slides, Opal Polymer HRP Ms+Rb as the secondary antibody and DAPI as the final nuclei counterstain were used.

| Panel 1 |    |               |                   |            |                        |       | Panel 2 |    |               |                   |            |                        |       |
|---------|----|---------------|-------------------|------------|------------------------|-------|---------|----|---------------|-------------------|------------|------------------------|-------|
| #       | AR | Marker        | Antibody<br>Diln. | Incubation | OPAL<br>$\lambda$ [nm] | Diln. | #       | AR | Marker        | Antibody<br>Diln. | Incubation | OPAL<br>$\lambda$ [nm] | Diln. |
| 1       | 9  | CD3e          | 1:500             | 1 h/RT     | 620                    | 1:100 | 1       | 9  | PD-1          | 1:50              | OVN/4°C    | 520                    | 1:50  |
| 2       | 9  | CD4           | 1:200             | OVN/4°C    | 540                    | 1:100 | 2       | 9  | CD4           | 1:200             | OVN/4°C    | 620                    | 1:100 |
| 3       | 9  | CD8- $\alpha$ | 1:500             | 1 h/RT     | 650                    | 1:100 | 3       | 9  | CTLA4         | 1:100             | OVN/4°C    | 540                    | 1:100 |
| 4       | 6  | FoxP3         | 1:50              | 1 h/RT     | 520                    | 1:100 | 4       | 9  | CD8- $\alpha$ | 1:500             | 1 h/RT     | 650                    | 1:100 |
| 5       | 6  | CK            | 1:800             | 1 h/RT     | 690                    | 1:200 | 5       | 6  | CK            | 1:800             | 1 h/RT     | 690                    | 1:200 |
| Panel 3 |    |               |                   |            |                        |       | Panel 4 |    |               |                   |            |                        |       |
| #       | AR | Marker        | Antibody<br>Diln. | Incubation | OPAL<br>$\lambda$ [nm] | Diln. | #       | AR | Marker        | Antibody<br>Diln. | Incubation | OPAL<br>$\lambda$ [nm] | Diln. |
| 1       | 9  | CD3e          | 1:400             | 1 h/RT     | 620                    | 1:100 | 1       | 9  | CD4           | 1:200             | OVN/4°C    | 540                    | 1:100 |
| 2       | 9  | VEGF          | 1:50              | OVN/4°C    | 520                    | 1:100 | 2       | 9  | ICOS          | 1:50              | OVN/4°C    | 520                    | 1:50  |
| 3       | 6  | Ki67          | 1:100             | 1 h/RT     | 540                    | 1:100 | 3       | 6  | FoxP3         | 1:50              | 1 h/RT     | 570                    | 1:100 |
| 4       | 6  | CK            | 1:800             | 1 h/RT     | 690                    | 1:200 | 4       | 6  | CCR4          | 1:200             | 1 h/RT     | 620                    | 1:100 |
|         |    |               |                   |            |                        |       | 5       | 6  | CK            | 1:800             | 1 h/RT     | 690                    | 1:200 |

Abbreviations: # - serial No. of antibodies, AR – antigen retrieval buffer pH, Diln. – dilution, RT – room temperature, OVN – overnight

**Table S2.** Cell counts/Mpx in the parenchyma and stroma of HNSCC tumors.

| Panel | Cell population      | Parenchyma |                    |        |         | Stroma     |                    |        |         | Parenchyma-Stroma correlation (r) |
|-------|----------------------|------------|--------------------|--------|---------|------------|--------------------|--------|---------|-----------------------------------|
|       |                      | Zeros* (%) | Min. nonzero value | Median | Max.    | Zeros* (%) | Min. nonzero value | Median | Max.    |                                   |
| 1     | CD3+CD4+ (Th)        | 6          | 0.27               | 5.01   | 264.2   | 1          | 0.46               | 53.85  | 1912.8  | 0.71                              |
|       | CD3+CD8+ (Tc)        | 3          | 0.17               | 29.42  | 714.56  | 1          | 0.28               | 52.42  | 899.09  | 0.83                              |
|       | CD3+CD4+FOXP3+(Treg) | 9          | 0.21               | 8.24   | 135.58  | 2          | 0.69               | 35.6   | 507.13  | 0.68                              |
|       | Th + Tc + Treg sum   | 0          | 0.17               | 53.42  | 1094.88 | 0          | 2.77               | 205.95 | 2205.32 | 0.76                              |
| 2     | CD4+                 | 2          | 0.17               | 7.95   | 213.54  | 0          | 1.63               | 134.67 | 1563.11 | 0.70                              |
|       | PD-1+CD4+            | 7          | 0.22               | 4.62   | 607.33  | 9          | 0.53               | 37.76  | 1630.56 | 0.80                              |
|       | CTLA4+CD4+           | 11         | 0.17               | 2.09   | 48.85   | 6          | 0.45               | 9.23   | 1148.64 | 0.73                              |
|       | CD8+                 | 14         | 0.18               | 4.94   | 318.1   | 5          | 0.54               | 41.91  | 907.32  | 0.81                              |
|       | PD-1+CD8+            | 23         | 0.2                | 2.55   | 709.31  | 21         | 0.25               | 6.41   | 1445    | 0.85                              |
|       | CTLA4+CD8+           | 79         | 0.16               | 0      | 9.85    | 76         | 0.24               | 0      | 96.14   | 0.49                              |
| 3     | CD3+                 | 2          | 0.48               | 35.46  | 465.77  | 0          | 0.46               | 192.92 | 1628.73 | 0.64                              |
|       | Ki67+                | 27         | 0.18               | 0.82   | 684.08  | 47         | 0.21               | 0.3    | 656.79  | 0.69                              |
|       | VEGF+                | 14         | 0.19               | 5.9    | 446.56  | 29         | 0.29               | 1.25   | 904.2   | 0.44                              |
| 4     | CD4+                 | 6          | 0.2                | 4.47   | 599.06  | 0          | 0.33               | 117.77 | 2055.96 | 0.71                              |
|       | FOXP3+CD4+           | 7          | 0.19               | 5.98   | 252.41  | 1          | 2.11               | 46.83  | 596.52  | 0.77                              |
|       | ICOS+CD4+            | 10         | 0.17               | 2.99   | 125.25  | 8          | 0.25               | 10.64  | 668.6   | 0.76                              |
|       | ICOS+FOXP3+CD4+      | 15         | 0.17               | 3.25   | 67.54   | 6          | 0.28               | 10.16  | 198.21  | 0.77                              |
