# Supplementary material for: PD1+CD8+ Cells Are an Independent Prognostic Marker in Patients with Head and Neck Cancer
Source: Biomedicines. 2022 Nov 3;10(11):2794. doi: 10.3390/biomedicines10112794 (PMC9687997; doi:10.3390/biomedicines10112794)
Supplement: Supplementary file 1 [file biomedicines-10-02794-s001.zip › Table S3.xlsx]

## Sheet: models including HPV
Cox models with 3 variables including the HPV status
Disease specific survival (DSS)										Overall survival (OS)
parenchyma or stroma					parenchyma + stroma					parenchyma or stroma					parenchyma + stroma
model No	variable	HR	p.value	BIC score	model No	variable	HR	p.value	BIC score	model No	variable	HR	p.value	BIC score	model No	variable	HR	p.value	BIC score
1	HPV.RNA	0.14637	0.0011	169.159	1	HPV.RNA	0.226692	0.0057	171.499	1	pS	1.55479	0.0179	308.96	1	pS	1.56607	0.016	307.314
	PD1+CD8+_stroma	0.436487	0.0007			T.cells.P1	2.78527	0.0094			HPV.RNA	0.257091	0.0003			HPV.RNA	0.258442	0.0004
	CD4+/Treg_par	3.18256	0.0016			PD1+CD8+	0.355329	0.0001			PD1+CD8+_par	0.527126	0.0003			PD1+CD8+	0.521326	0.0001
2	HPV.RNA	0.187645	0.0033	172.331	2	pS	1.90609	0.0119	171.634	2	pS	1.59184	0.0138	309.715	2	pN	1.47982	0.0315	308.858
	PD1+CD8+_par	0.44781	0.0042			HPV.RNA	0.231208	0.0055			HPV.RNA	0.247861	0.0002			HPV.RNA	0.24985	0.0005
	CD4+/Treg_par	2.45382	0.0035			PD1+CD8+	0.428362	0.0009			PD1+CD8+_stroma	0.553497	0.0003			PD1+CD8+	0.522455	0.0002
3	pS	1.95236	0.0108	172.782	3	pN	1.91502	0.0131	172.215	3	HPV.RNA	0.226894	0.0003	309.759	3	HPV.RNA	0.256379	0.0005	308.928
	HPV.RNA	0.219709	0.0039			HPV.RNA	0.227516	0.0062			PD1+CD8+_par	0.540609	0.0004			T.cells.P1	1.93127	0.0336
	PD1+CD8+_stroma	0.455129	0.0012			PD1+CD8+	0.406855	0.0005			CD4+/Treg_par	1.68076	0.0247			PD1+CD8+	0.453597	0
4	HPV.RNA	0.16932	0.0023	172.973	4	HPV.RNA	0.204919	0.0042	172.338	4	pN	1.45915	0.037	310.57	4	HPV.RNA	0.247207	0.0004	309.37
	PD1+CD4+_stroma	0.5145	0.0016			CD3+CD8+	2.34167	0.0156			HPV.RNA	0.249698	0.0004			CD3+CD8+	1.72965	0.0457
	CD4+/Treg_par	2.52178	0.0068			PD1+CD8+	0.33497	0.0001			PD1+CD8+_par	0.533353	0.0004			PD1+CD8+	0.441358	0
5	pN	2.00341	0.0106	173.084	5	HPV.RNA	0.222485	0.0059	172.824	5	HPV.RNA	0.206367	0.0002	310.794	5	HPV.RNA	0.37583	0.013	310.206
	HPV.RNA	0.21071	0.0042			PD1+CD8+	0.372241	0.0002			PD1+CD8+_stroma	0.576805	0.0005			CTLA4+CD8+	1.94091	0.0403
	PD1+CD8+_stroma	0.422111	0.0007			CD8+/Treg	2.03048	0.0119			CD4+/Treg_par	1.77447	0.0225			PD1+CD8+	0.497041	0.0002
6	HPV.RNA	0.19134	0.0041	173.191	6	HPV.RNA	0.259764	0.011	172.853	6	pN	1.51085	0.0264	311.251	6	HPV.RNA	0.266425	0.0007	310.289
	PD1+CD8+_stroma	0.365223	0.0004			PD1+CD8+	0.418038	0.0005			HPV.RNA	0.237779	0.0003			PD1+CD8+	0.518549	0.0001
	CD8+/Treg	2.36431	0.0082			CD3+CD4+	1.99841	0.0169			PD1+CD8+_stroma	0.551851	0.0005			CD3+CD4+	1.49872	0.0688
7	HPV.RNA	0.171638	0.0021	173.362	7	AGE	0.941738	0.0064	172.964	7	pS	1.56471	0.0176	311.426	7	HPV.RNA	0.262622	0.0007	310.791
	PD1+CD4+_par	0.459681	0.0044			T.cells.P1	2.32495	0.0246			HPV.RNA	0.274252	0.0004			PD1+CD8+	0.49316	0.0001
	CD4+/Treg_par	2.66047	0.0036			PD1+CD8+	0.303319	0			PD1+CD4+_par	0.523819	0.0008			CD8+/Treg	1.47358	0.0853
8	HPV.RNA	0.152778	0.001	173.473	8	HPV.RNA	0.268457	0.0124	173.316	8	pT	1.47512	0.0528	311.584	8	pT	1.40674	0.0816	310.832
	CD4+/Treg_par	2.52996	0.0056			PD1+CD8+	0.433769	0.0009			HPV.RNA	0.328142	0.0026			HPV.RNA	0.325969	0.0027
	zero_PD1+CD8+_stroma	4.00604	0.0014			CD4+/Treg	1.80482	0.0158			PD1+CD8+_par	0.552122	0.0008			PD1+CD8+	0.558369	0.0005
9	HPV.RNA	0.197551	0.0051	173.692	9	AGE	0.93643	0.004	173.587	9	HPV.RNA	0.255327	0.0005	311.685	9	smoking actual	0.420376	0.0218	311.227
	CD8+/Treg	2.31467	0.0079			CD3+CD8+	2.01452	0.033			PD1+CD8+_par	0.494589	0.0002			CTLA4+CD8+	1.99321	0.0342
	PD1+CD4+_stroma	0.385832	0.0001			PD1+CD8+	0.29003	0			CD8+/Treg_par	1.55508	0.0704			PD1+CD8+	0.477636	0.0001
10	HPV.RNA	0.212609	0.0051	173.939	10	AGE	0.947166	0.0093	173.721	10	P16	0.232096	0.0002	312.016	10	smoking actual	0.33369	0.0026	311.235
	CD8+/Treg	2.32627	0.0176			PD1+CD8+	0.338512	0.0001			pS	1.70468	0.0065			pS	1.40275	0.0657
	PD1+CD8+_stroma	0.351675	0.0001			CD4+/Treg	1.7828	0.0275			zero_PD1+CD8+_par	2.89138	0.0017			PD1+CD8+	0.503467	0.0001
11	pS	1.90652	0.0118	174.032	11	AGE	0.947509	0.0109	173.84	11	pS	1.50746	0.0253	312.116	11	smoking actual	0.356573	0.0367	311.301
	HPV.RNA	0.231118	0.005			PD1+CD8+	0.337516	0			HPV.RNA	0.265285	0.0003			CTLA4+CD8+	2.38096	0.0043
	PD1+CD8+_par	0.44224	0.0026			CD3+CD4+	1.8461	0.0353			PD1+CD4+_stroma	0.575562	0.0006			PD1+CD8+	0.451538	0
12	HPV.RNA	0.170634	0.0023	174.147	12	AGE	0.940274	0.0056	173.859	12	HPV.RNA	0.271125	0.0007	312.147	12	HPV.RNA	0.277447	0.001	311.327
	CD4+/Treg_par	2.87545	0.0026			PD1+CD8+	0.304106	0			CD3+CD8+_stroma	1.55695	0.099			PD1+CD8+	0.543553	0.0003
	zero_PD1+CD8+_par	4.40989	0.0028			CD8+/Treg	1.90154	0.0287			PD1+CD8+_par	0.475458	0.0003			CD4+/Treg	1.33973	0.1195
13	AGE	0.934959	0.0032	174.568	13	pT	2.04162	0.009	174.115	13	HPV.RNA	0.242806	0.0003	312.22	13	gender	1.99417	0.1097	311.358
	CD3+CD8+_stroma	2.19209	0.0165			T.cells.P1	2.60245	0.0201			PD1+CD8+_stroma	0.506621	0.0002			HPV.RNA	0.293462	0.0014
	PD1+CD8+_stroma	0.296947	0			PD1+CD8+	0.337618	0.0001			CD8+/Treg	1.65468	0.0422			PD1+CD8+	0.52543	0.0003
14	HPV.RNA	0.190866	0.0022	174.873	14	CTLA4+CD8+	3.84601	0.0035	174.27	14	HPV.RNA	0.233548	0.0003	312.556	14	T.cells.P3	0.555333	0.0165	311.593
	CD8+/Treg_par	2.32565	0.0107			PD1+CD8+	0.282884	0.0001			PD1+CD4+_par	0.550753	0.0013			CTLA4+CD8+	2.61849	0.0019
	zero_PD1+CD8+_stroma	6.91243	0.0002			CD4+/Treg	1.89094	0.0193			CD4+/Treg	1.69425	0.0297			PD1+CD8+	0.520055	0.0011
15	pN	1.85146	0.0166	175.105	15	pT	1.74628	0.0301	174.615	15	P16	0.286873	0.0015	312.569	15	P16	0.301377	0.0025	311.641
	HPV.RNA	0.233017	0.0062			HPV.RNA	0.322751	0.0288			pS	1.70546	0.0066			pS	1.7092	0.0067
	PD1+CD8+_par	0.430483	0.0019			PD1+CD8+	0.505861	0.0088			PD1+CD8+_par	0.602231	0.0061			PD1+CD8+	0.593438	0.0035
16	pS	1.75719	0.0265	175.116	16	AGE	0.948481	0.0234	174.712	16	HPV.RNA	0.277124	0.0009	312.617	16	smoking	0.492267	0.1838	311.746
	HPV.RNA	0.247115	0.007			CTLA4+CD8+	2.783	0.0228			PD1+CD8+_par	0.523593	0.0004			HPV.RNA	0.39953	0.0229
	PD1+CD4+_stroma	0.506574	0.0017			PD1+CD8+	0.313094	0.0002			CD3+CD4+_stroma	1.41555	0.1222			PD1+CD8+	0.55077	0.0004
17	pN	1.7733	0.0265	175.419	17	pT	1.87416	0.019	174.769	17	HPV.RNA	0.250911	0.0004	312.618	17	CTLA4+CD8+	2.37189	0.0057	311.964
	HPV.RNA	0.240117	0.0074			CTLA4+CD8+	3.20682	0.0061			CD3+CD8+_stroma	1.64596	0.0583			PD1+CD8+	0.395201	0
	PD1+CD4+_stroma	0.472145	0.0008			PD1+CD8+	0.364415	0.0007			PD1+CD8+_stroma	0.490144	0.0002			zero_Ki67	0.419001	0.0387
18	pS	1.90403	0.0133	175.481	18	Smoking	0.154058	0.0709	174.809	18	HPV.RNA	0.310619	0.0019	312.67	18	smoking actual	0.323796	0.002	311.982
	HPV.RNA	0.23592	0.0048			pS	1.65821	0.043			CCR4+_stroma	0.65777	0.119			T.cells.P1	1.66215	0.0934
	PD1+CD4+_par	0.458473	0.0034			PD1+CD8+	0.391122	0.0002			PD1+CD8+_par	0.58388	0.0018			PD1+CD8+	0.451147	0
19	HPV.RNA	0.204253	0.0053	175.515	19	AGE	0.949053	0.0171	174.835	19	pN	1.4788	0.0302	312.735	19	HPV.RNA	0.272541	0.001	311.993
	PD1+CD8+_stroma	0.44323	0.0008			pS	1.59021	0.0684			HPV.RNA	0.25884	0.0004			PD1+CD8+	0.526114	0.0003
	CD8+/Treg_stroma	1.75328	0.0243			PD1+CD8+	0.367864	0.0001			PD1+CD4+_par	0.528472	0.0009			CD4+(P4)	1.34811	0.203
20	AGE	0.950471	0.0132	175.685	20	T.cells.P1	2.37367	0.0356	174.913	20	P16	0.338592	0.0107	312.835	20	HPV.RNA	0.38297	0.0198	312.035
	PD1+CD8+_stroma	0.371245	0.0001			CTLA4+CD8+	3.37162	0.0058			pS	1.58694	0.0174			PD1+CD8+	0.518206	0.0004
	CD4+/Treg_par	1.97552	0.0309			PD1+CD8+	0.248466	0			T.cells.P3	0.478399	0.0038			Zero_Ki67	0.58	0.2158

## Sheet: models without HPV
Cox models with 3 variables with the HPV status NOT included
Disease specific survival (DSS)										Overall survival (OS)
parenchyma or stroma					parenchyma + stroma					parenchyma or stroma					parenchyma + stroma
model No	variable	HR	p.value	BIC	model No	variable	HR	p.value	BIC	model No	variable	HR	p.value	BIC	model No	variable	HR	p.value	BIC
1	AGE	0.934959	0.0032	174.568	1	AGE	0.941738	0.0064	172.964	1	smoking actual	0.368174	0.0055	313.131	1	smoking actual	0.420376	0.0218	311.227
	CD3+CD8+_stroma	2.19209	0.0165			T.cells.P1	2.32495	0.0246			pT	1.44487	0.0709			CTLA4+CD8+	1.99321	0.0342
	CD8+PD1+_stroma	0.296947	0			CD8+PD1+	0.303319	0			CD8+PD1+_par	0.521253	0.0003			CD8+PD1+	0.477636	0.0001
2	AGE	0.950471	0.0132	175.685	2	AGE	0.93643	0.004	173.587	2	smoking actual	0.338587	0.0026	313.198	2	smoking actual	0.33369	0.0026	311.235
	CD8+PD1+_stroma	0.371245	0.0001			CD3+CD8+	2.01452	0.033			pS	1.35802	0.093			pS	1.40275	0.0657
	CD4+/Treg_par	1.97552	0.0309			CD8+PD1+	0.29003	0			CD8+PD1+_par	0.508048	0.0002			CD8+PD1+	0.503467	0.0001
3	smoking	0.116404	0.0431	175.721	3	AGE	0.947166	0.0093	173.721	3	smoking actual	0.311118	0.0014	313.304	3	smoking	0.356573	0.0367	311.301
	CD8+PD1+_stroma	0.344012	0.0002			CD8+PD1+	0.338512	0.0001			CD8+PD1+_par	0.509309	0.0002			CTLA4+CD8+	2.38096	0.0043
	CD8+/Treg_par	2.15981	0.0218			CD4+/Treg	1.7828	0.0275			CD4+/Treg_par	1.4248	0.091			CD8+PD1+	0.451538	0
4	smoking	0.155938	0.0709	175.968	4	AGE	0.947509	0.0109	173.84	4	smoking actual	0.338929	0.0027	313.42	4	T.cells.P3	0.555333	0.0165	311.593
	CD8+PD1+_stroma	0.41744	0.0004			CD8+PD1+	0.337516	0			ccr4+_stroma	0.638554	0.0926			CTLA4+CD8+	2.61849	0.0019
	CD4+/Treg_par	1.97474	0.0267			CD3+CD4+	1.8461	0.0353			CD8+PD1+_par	0.555815	0.0008			CD8+PD1+	0.520055	0.0011
5	smoking actual	0.318231	0.0209	176.023	5	AGE	0.940274	0.0056	173.859	5	gender	2.05482	0.0981	313.754	5	CTLA4+CD8+	2.37189	0.0057	311.964
	CD8+PD1+_stroma	0.411248	0.0004			CD8+PD1+	0.304106	0			smoking actual	0.32004	0.0018			CD8+PD1+	0.395201	0
	CD4+/Treg_par	2.40974	0.0115			CD8+/Treg	1.90154	0.0287			CD8+PD1+_par	0.495467	0.0003			zero_Ki67	0.419001	0.0387
6	smoking	0.122936	0.0498	176.268	6	pT	2.04162	0.009	174.115	6	pT	1.53967	0.0337	313.773	6	smoking actual	0.323796	0.002	311.982
	CD8+/Treg_par	2.16261	0.0204			T.cells.P1	2.60245	0.0201			T.cells.P3	0.48879	0.0056			T.cells.P1	1.66215	0.0934
	CD4+PD1+_stroma	0.361369	0			CD8+PD1+	0.337618	0.0001			CD8+PD1+_par	0.643052	0.0296			CD8+PD1+	0.451147	0
7	AGE	0.952305	0.0143	176.387	7	CTLA4+CD8+	3.84601	0.0035	174.27	7	smoking actual	0.454471	0.0472	313.876	7	smoking actual	0.419307	0.0215	312.137
	CD8+PD1+_par	0.334758	0.0004			CD8+PD1+	0.282884	0.0001			T.cells.P3	0.636018	0.1232			CD8+PD1+	0.492867	0.0001
	CD4+/Treg_par	1.78896	0.0341			CD4+/Treg	1.89094	0.0193			CD8+PD1+_par	0.622823	0.0205			zero_Ki67	0.511836	0.113
8	smoking	0.152351	0.0685	176.504	8	AGE	0.948481	0.0234	174.712	8	T.cells.P3	0.413155	0.0002	314.082	8	pS	1.53803	0.0263	312.23
	pS	1.69768	0.0402			CTLA4+CD8+	2.783	0.0228			CD8+/Treg_par	1.49639	0.0681			CD8+PD1+	0.403959	0
	CD8+PD1+_stroma	0.416796	0.0004			CD8+PD1+	0.313094	0.0002			CD4+PD1+_stroma	0.59359	0.0066			zero_Ki67	0.308619	0.0059
9	AGE	0.936283	0.0044	176.615	9	pT	1.87416	0.019	174.769	9	pS	1.37191	0.0837	314.134	9	smoking actual	0.326138	0.0025	312.356
	CD8+PD1+_stroma	0.361959	0.0001			CTLA4+CD8+	3.20682	0.0061			T.cells.P3	0.437054	0.0005			pN	1.32214	0.1167
	CD8+/Treg_stroma	1.71004	0.0363			CD8+PD1+	0.364415	0.0007			CD4+PD1+_stroma	0.662973	0.0208			CD8+PD1+	0.505114	0.0001
10	AGE	0.942622	0.0085	176.848	10	smoking	0.154058	0.0709	174.809	10	smoking	0.267995	0.0095	314.183	10	gender	2.07372	0.0945	312.365
	CD8+PD1+_stroma	0.437585	0.0008			pS	1.65821	0.043			pS	1.47812	0.0357			smoking actual	0.323885	0.0022
	zero_CCR4+Treg_par	2.89648	0.0307			CD8+PD1+	0.391122	0.0002			CD8+PD1+_par	0.477131	0.0001			CD8+PD1+	0.498565	0.0001
11	T.cells.P3	0.483963	0.023	176.927	11	AGE	0.949053	0.0171	174.835	11	smoking	0.477229	0.1703	314.195	11	smoking actual	0.314672	0.0018	312.401
	CD8+PD1+_stroma	0.49518	0.0071			pS	1.59021	0.0684			smoking actual	0.445526	0.0352			CD3+CD8+	1.50677	0.1223
	CD4+/Treg_par	2.22778	0.0188			CD8+PD1+	0.367864	0.0001			CD8+PD1+_par	0.527838	0.0004			CD8+PD1+	0.445434	0.0001
12	AGE	0.953798	0.0333	176.954	12	T.cells.P1	2.37367	0.0356	174.913	12	smoking	0.404388	0.0736	314.196	12	smoking actual	0.367028	0.0057	312.404
	pT	1.827	0.0331			CTLA4+CD8+	3.37162	0.0058			T.cells.P3	0.55563	0.0283			pT	1.38046	0.1049
	CD8+PD1+_par	0.425011	0.0018			CD8+PD1+	0.248466	0			CD8+PD1+_par	0.628884	0.0233			CD8+PD1+	0.5344	0.0002
13	smoking	0.130965	0.0516	177.078	13	AGE	0.949985	0.0233	175.076	13	smoking actual	0.331544	0.0024	314.273	13	smoking	0.275217	0.0102	312.427
	CCR4+Treg_stroma	0.586071	0.0362			pT	1.69647	0.0525			pN	1.2736	0.1677			pS	1.48153	0.0331
	CD8+PD1+_stroma	0.471942	0.002			CD8+PD1+	0.416333	0.0007			CD8+PD1+_par	0.512651	0.0003			CD8+PD1+	0.483362	0
14	smoking	0.16416	0.0796	177.102	14	CTLA4+CD8+	3.96003	0.0027	175.092	14	pS	1.40414	0.0666	314.381	14	pT	1.52455	0.0371	312.668
	CD8+PD1+_par	0.375282	0.0011			CD8+PD1+	0.255681	0			T.cells.P3	0.446189	0.0012			CTLA4+CD8+	2.78201	0.0009
	CD4+/Treg_par	1.80871	0.0282			CD8+/Treg	1.90815	0.031			CD8+PD1+_stroma	0.671999	0.0277			CD8+PD1+	0.443131	0
15	AGE	0.947769	0.0152	177.126	15	smoking	0.166233	0.082	175.163	15	pS	1.40205	0.0682	314.389	15	smoking actual	0.329759	0.0024	312.883
	CD8+PD1+_stroma	0.337809	0.0002			CD8+PD1+	0.378142	0.0002			T.cells.P3	0.469204	0.0031			CD8+PD1+	0.501438	0.0001
	CD8+/Treg_par	1.72067	0.0528			CD4+/Treg	1.70788	0.036			CD8+PD1+_par	0.640416	0.0273			CD3+CD4+	1.36269	0.161
16	smoking	0.192967	0.111	177.166	16	AGE	0.954088	0.0398	175.246	16	smoking actual	0.330749	0.0023	314.473	16	smoking	0.480491	0.1726	312.883
	pT	1.88432	0.0183			smoking	0.219642	0.1438			pS	1.42151	0.0599			smoking actual	0.451975	0.0412
	CD8+PD1+_par	0.449766	0.0038			CD8+PD1+	0.403528	0.0005			CD8+PD1+_stroma	0.542206	0.0003			CD8+PD1+	0.531725	0.0002
17	smoking	0.16191	0.0777	177.17	17	CTLA4+CD8+	3.16454	0.0093	175.397	17	pT	1.49923	0.0469	314.552	17	smoking	0.377064	0.0486	312.937
	pN	1.62566	0.0475			CD8+PD1+	0.28286	0			T.cells.P3	0.448732	0.0009			CD8+PD1+	0.455664	0
	CD8+PD1+_stroma	0.394755	0.0004			CD3+CD4+	1.88175	0.0416			zero_CD8+PD1+_par	2.17091	0.0375			zero_Ki67	0.438729	0.046
18	smoking	0.148015	0.0666	177.207	18	pT	2.09161	0.0101	175.43	18	pT	1.46268	0.0545	314.574	18	smoking actual	0.318615	0.0022	313.154
	pS	1.69802	0.0363			CD8+PD1+	0.356191	0.0003			T.cells.P3	0.450497	0.0014			CD8+PD1+	0.487449	0.0001
	CD8+PD1+_par	0.384391	0.0008			CD8+/Treg	1.81659	0.0296			CD8+PD1+_stroma	0.703082	0.0472			CD8+/Treg	1.36169	0.1831
19	pT	2.03879	0.0136	177.218	19	smoking	0.190092	0.1089	175.56	19	smoking	0.463966	0.123	314.597	19	smoking actual	0.329914	0.0026	313.388
	CD8+PD1+_stroma	0.376747	0.0007			CTLA4+CD8+	2.66022	0.0227			T.cells.P3	0.479879	0.0025			CD8+PD1+	0.524299	0.0001
	CD8+/Treg_par	1.89861	0.0237			CD8+PD1+	0.346725	0.0004			CD4+PD1+_stroma	0.678849	0.0242			CD4+/Treg	1.26956	0.2158
20	pT	2.35162	0.0032	177.229	20	smoking	0.14667	0.0649	175.564	20	pS	1.40072	0.0692	314.649	20	smoking actual	0.356087	0.0043	313.477
	CD8+PD1+_par	0.497442	0.0071			CD8+PD1+	0.349515	0.0001			T.cells.P3	0.438335	0.0005			CD8+PD1+	0.603898	0.0082
	zero_CCR4+Treg_par	3.1149	0.0294			CD8+/Treg	1.77177	0.0483			zero_CD8+PD1+_par	2.32896	0.0238			zero_CD8+PD1+	1.75256	0.2256
